# Supplementary material
Source: Springer Nature journal article supplement (https://www.springermedizin.de/resource/supplementary/12947_2013_494_MOESM3_ESM.pdf/9555886)

### Longitudinal strain

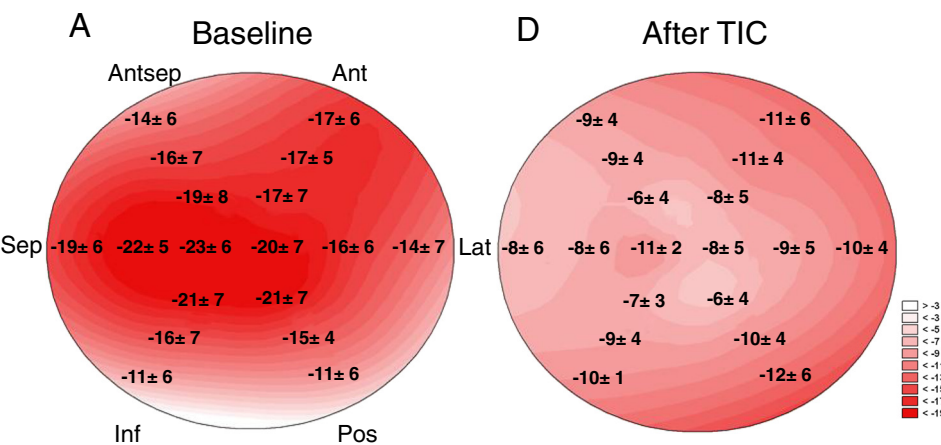

### Circumferential strain

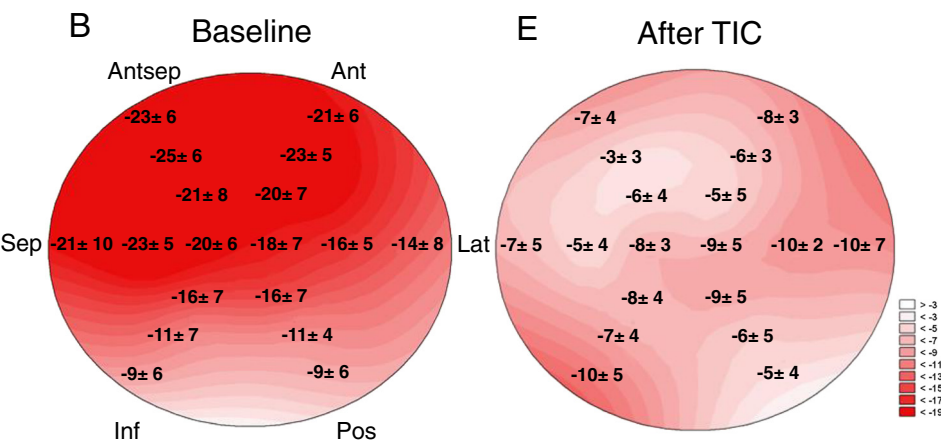

### Radial strain

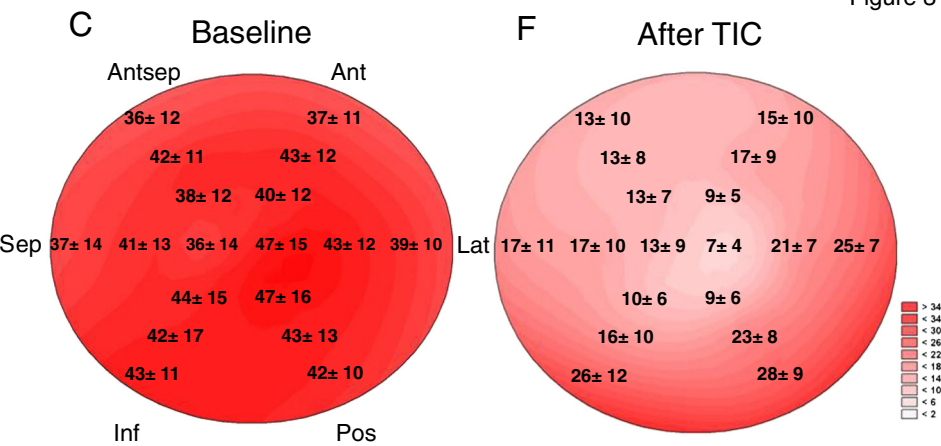

Figure 3

Supplement: MOESM3 [file 9555886]
